# Supplementary material for: Surface state-controlled C-dot/C-dot based dual-emission fluorescent nanothermometers for intra-cellular thermometry
Source: Royal Society of Chemistry journal article supplement (doi:10.1039/c8nr07445c), 2018-01-01
Supplement: c8nr07445c1.pdf [file c8nr07445c1.pdf]

## Supplementary Information

### **Surface state-controlled C-dots/C-dots based dual-emission fluorescent nanothermometer for intra-cellular thermometry**

Chan Wang<sup>§</sup>, Tantan Hu<sup>§</sup>, Tiju Thomas<sup>✉</sup>, Shanliang Song<sup>\*</sup>, Zhuoqi Wen<sup>\*</sup>,

Chuanxi Wang,<sup>\*</sup> Qijun Song<sup>\*, §</sup> and Minghui Yang<sup>\*,\*</sup>

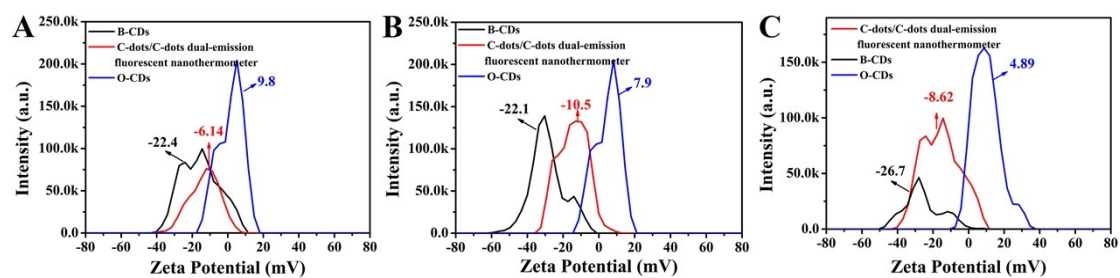

**Fig S1.** Zeta potential distribution of B-CDs (black line), O-CDs (blue line), and C-dots/C-dots dual-emission nanospheres (red line) at different pH, respectively. A: pH=5.0, B: pH=7.0, C: pH=9.0.

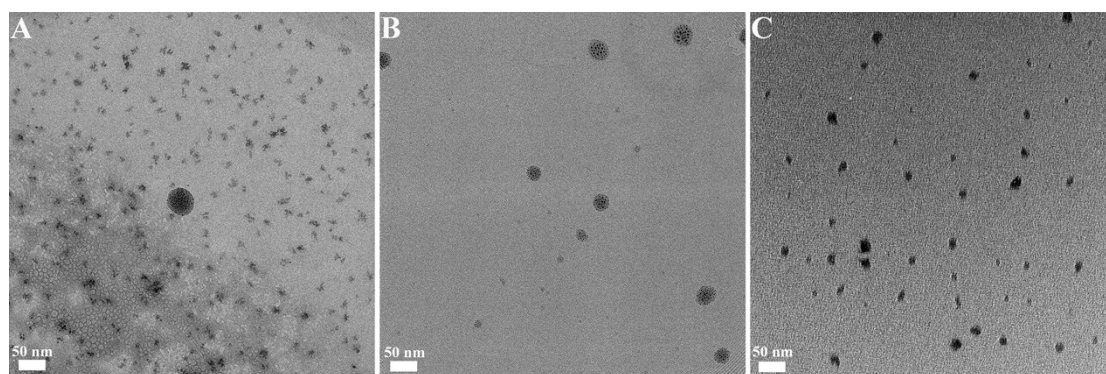

**Fig S2.** TEM of C-dots/C-dots dual-emission nanospheres at a varying feeding ratio of O-CDs to B-CDs: A, 3:1; B, 1:1; C, 1:2, respectively.

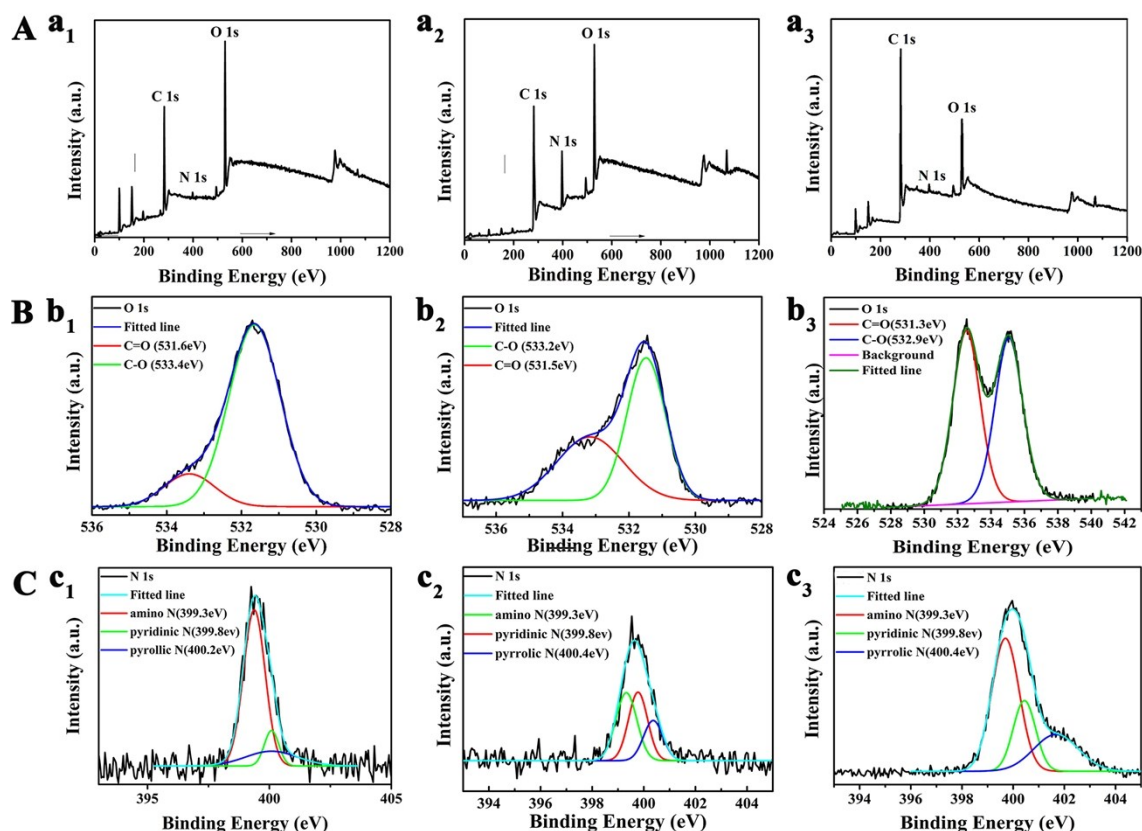

**Fig S3.** A: Full-survey X-ray photoelectron spectroscopy (XPS) of B-CDs ( $a_1$ ), O-CDs ( $a_2$ ), C-dots/C-dots dual-emission nanospheres ( $a_3$ ); B: high-resolution XPS O1s spectra of B-CDs 120 ( $b_1$ ), O-CDs ( $b_2$ ), CDs-based dual emissive nanoparticles ( $b_3$ ); C: high-resolution XPS N1s spectra of B-CDs 120 ( $c_1$ ), O-CDs ( $c_2$ ), CDs-based dual emissive nanoparticles ( $c_3$ ). Each band was deconvoluted following the literature.

**Table S1.** XPS data analyses of the C 1s spectra of B-CDs, O-CDs and C-dots/C-dots dual-emission nanospheres.

| Sample                                  | C-C/C=C | C-N/C-O | C=O   | COOH  |
|-----------------------------------------|---------|---------|-------|-------|
| B-CDs                                   | 0.404   | 0.313   | 0.255 | 0.028 |
| O-CDs                                   | 0.375   | 0.357   | 0.231 | 0.037 |
| C-dots/C-dots dual-emission nanospheres | 0.408   | 0.244   | 0.303 | 0.046 |

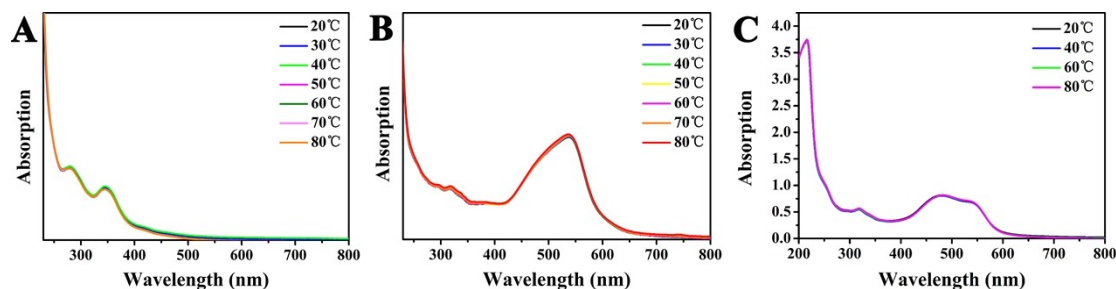

**Fig S4.** Absorption spectra of B-CDs (A), O-CDs (B), C-dots/C-dots dual-emission nanospheres (C) under varying temperature, respectively.

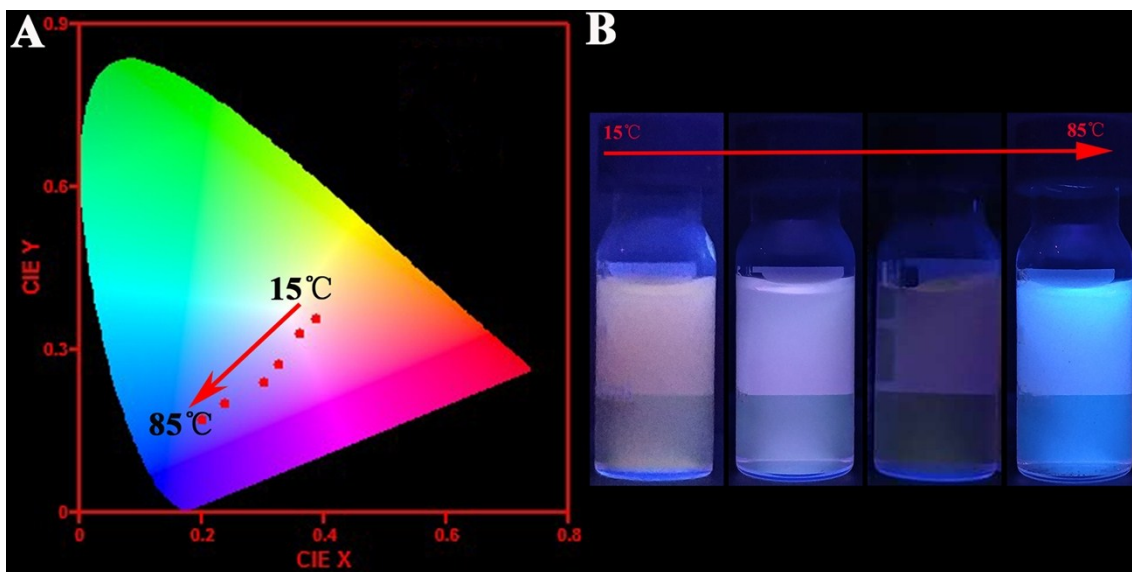

**Fig S5.** A: variation in the color coordinates of the C-dots/C-dots dual-emission nanospheres with increasing temperature from 15 to 85 °C; B: corresponding photograph of the C-dots/C-dots dual-emission nanospheres under increasing temperature.

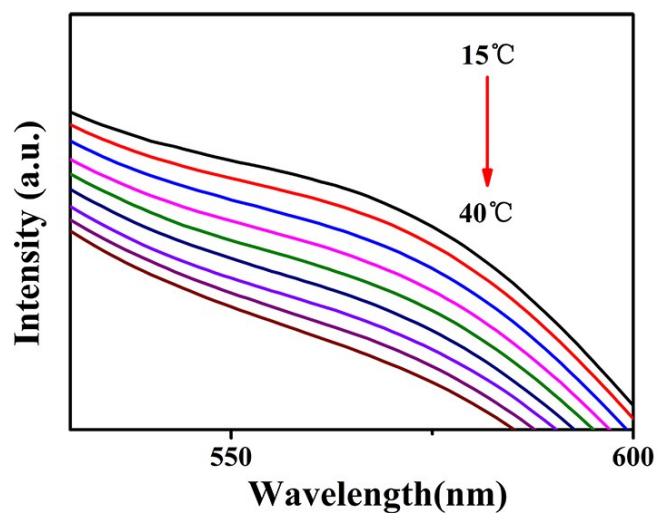

**Fig S6.** The magnified pattern at 590 nm of Figure 4A.

**Table S2.** A contrast of temperature responsive properties for recently reported CDs based nanothermometer.

| Materials                       | Synthesis Method            | Propertie       | Temperature range | Sensitivity | Comment                                                  | Reference |
|---------------------------------|-----------------------------|-----------------|-------------------|-------------|----------------------------------------------------------|-----------|
| Zn-CQDs                         | Zinc reduction method       | single emission | 10-100°C          | _____       | Low sensitivity and poor accuracy                        | 1         |
| CDs                             | Hydrothermal method         | single emission | 15-90°C           | 0.69%/°C    | Poor accuracy and repeatability                          | 2         |
| CDs@UiO-66                      | In-situ synthesis           | single emission | 25-110°C          | _____       | Low sensitivity and poor accuracy                        | 3         |
| CDs-Au NCs                      | Chemical crosslinking       | dual emission   | 20-75°C           | 1.8%/°C     | Complicated experiment procedure                         | 4         |
| CDs@(PSS/LDH) <sub>n</sub> UTFs | Layer-by-layer assembly     | dual emission   | 0-80°C            | 0.68%/°C    | Cumbersome process and low sensitivity                   | 5         |
| MSCDs                           | Multi-step synthesis        | dual emission   | 20-50°C           | 1.29%/°C    | CDs are not temperature sensitive                        | 6         |
| C-dots/C-dots                   | Electrostatic self-assembly | dual emission   | 15-85°C           | 0.93%/°C    | Simple, fast preparation and relatively high sensitivity | This work |

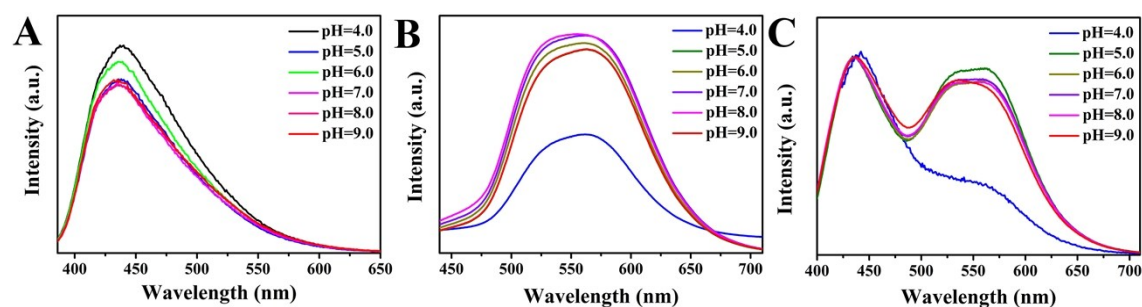

**Fig S7.** The PL spectra of B-CDs (A), O-CDs (B) and C-dots/C-dots dual-emission

nanospheres (C) under different pH ranges (4.0-9.0).

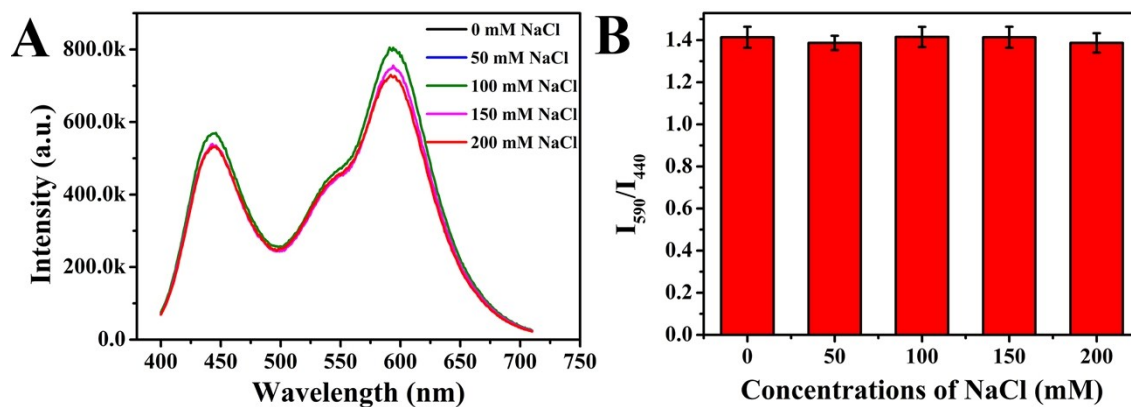

**Fig S8.** The PL intensity variation of C-dots/C-dots dual-emission nanospheres under different concentrations of NaCl (0-200mM).

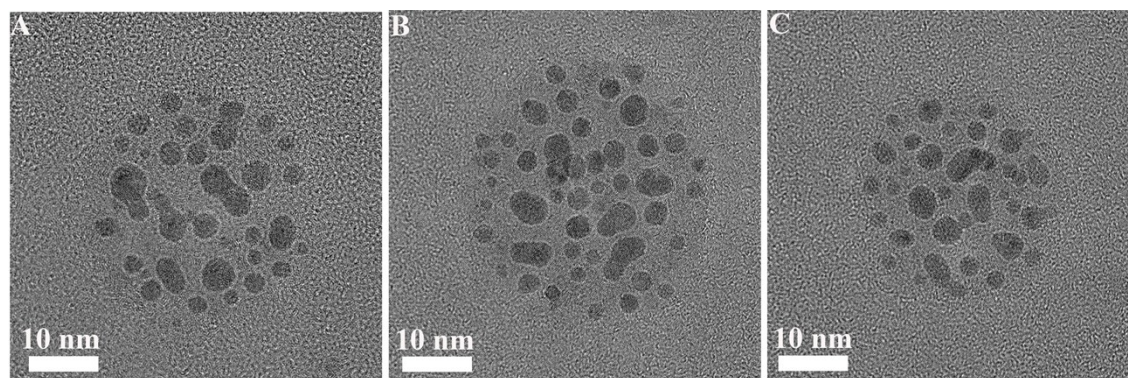

**Fig S9.** The HRTEM of C-dots/C-dots dual-emission nanospheres under a pH of 5.0 (A), 7.0 (B) and 9.0 (C), respectively.

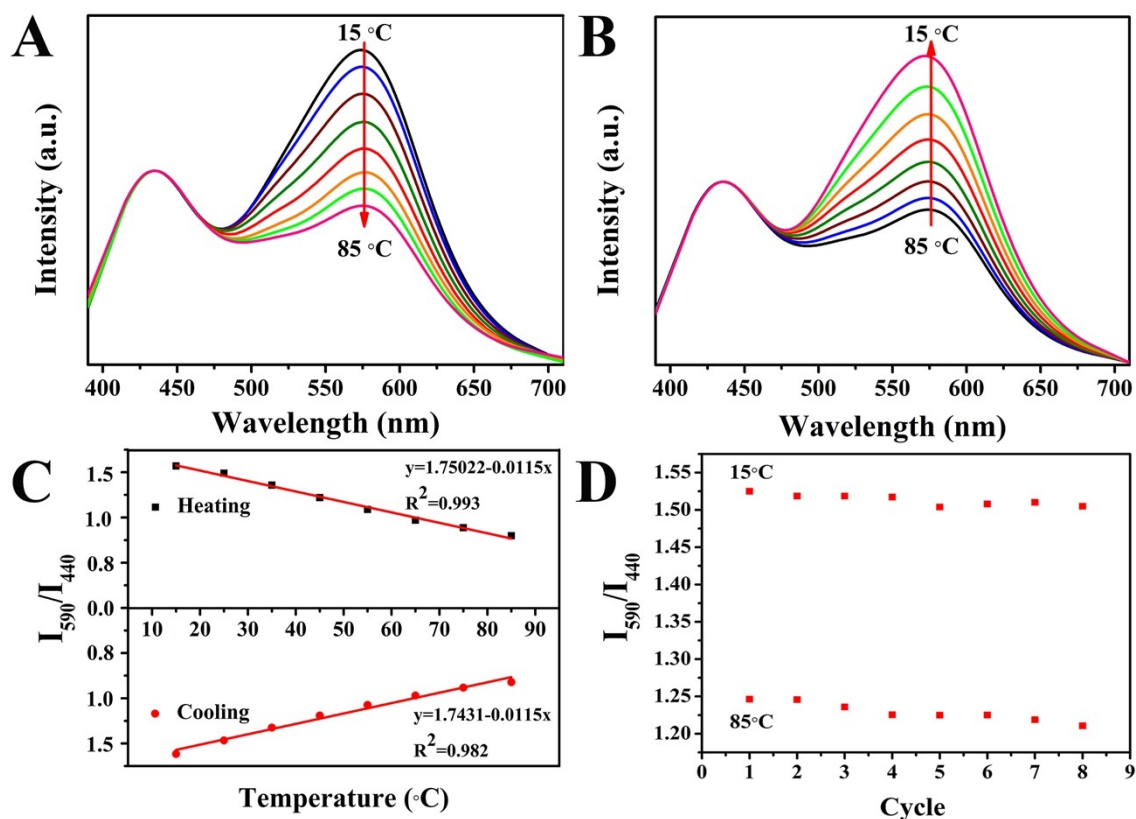

**Fig. S10** Temperature dependence of the fluorescence intensity from C-dots/C-dots dual-emission nanospheres in simulated physiological solution (pH~6.5-7.0, concentration of NaCl is 200 mM). (A) Fluorescence spectra measured under excitation of 380 nm with increasing temperature from 15 to 85 oC at steps of 10 °C. (B) Fluorescence spectra (excitation 380 nm ) for the decrease of temperature from 85 to 15 °C. (C) the fitted curve of intensity ratio of 440 to 590 nm vs. temperature. (D) eight cycles of intensity variations measured at 15–85 °C.

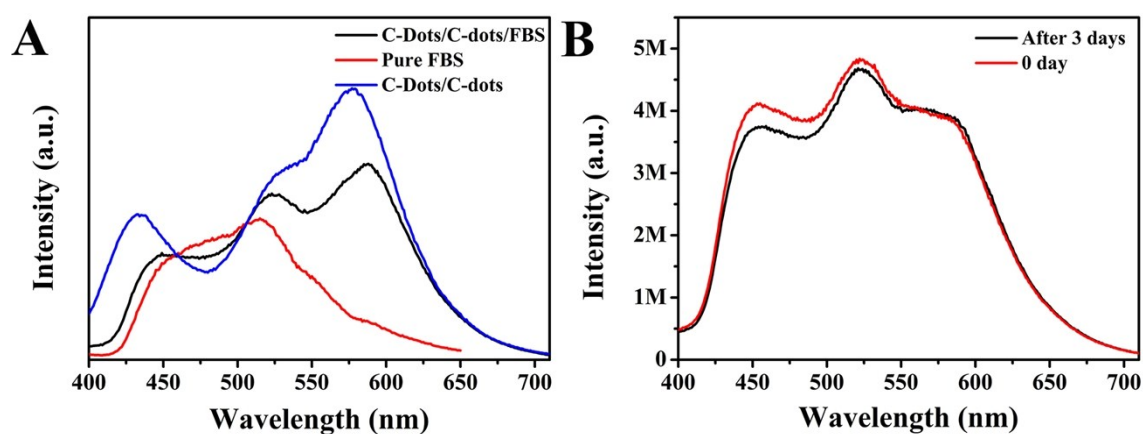

**Fig. S11** A: the PL spectra of C-dots/C-dots dual-emission nanospheres (blue), pure FBS (red line), and C-dots/C-dots/FBS composites (black line); B: the PL intensity variation of C-dots/C-dots/FBS composites after placed 3 days at room temperature.

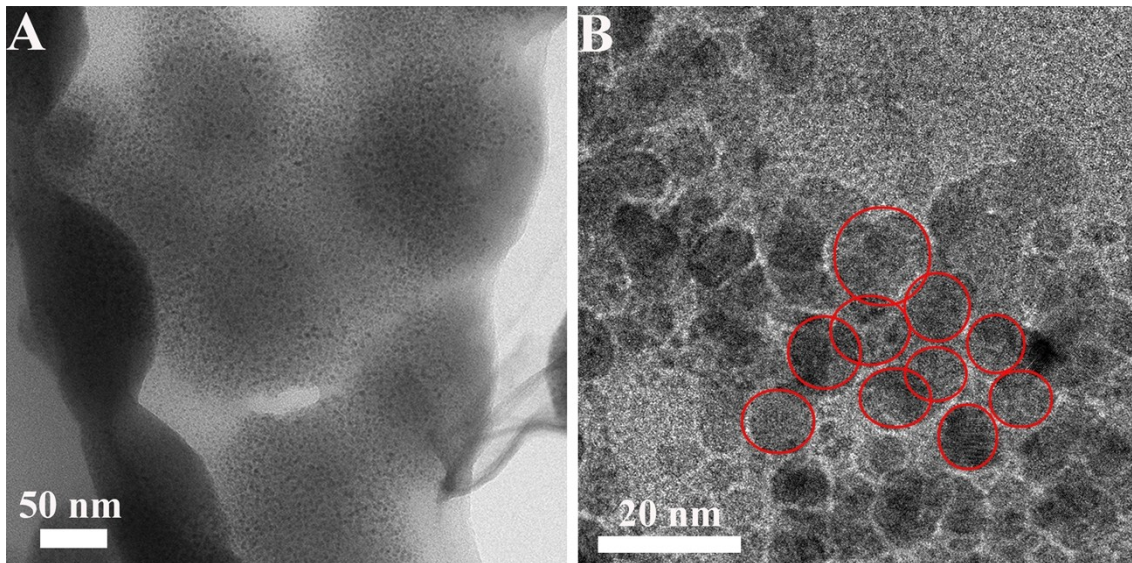

**Fig. S12** The TEM and magnified images of C-dots/C-dots/FBS composites, respectively.

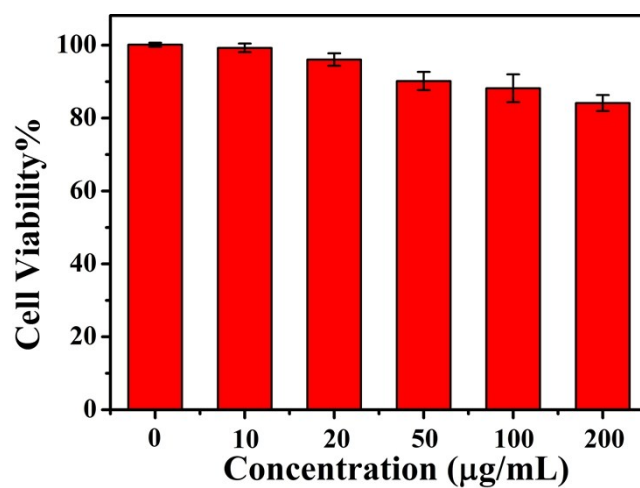

**Fig S13.** Cytotoxicity of the C-dots/C-dots dual-emission fluorescent nanothermometer toward of MC3T3-EI cells, as assessed using the MTT method.



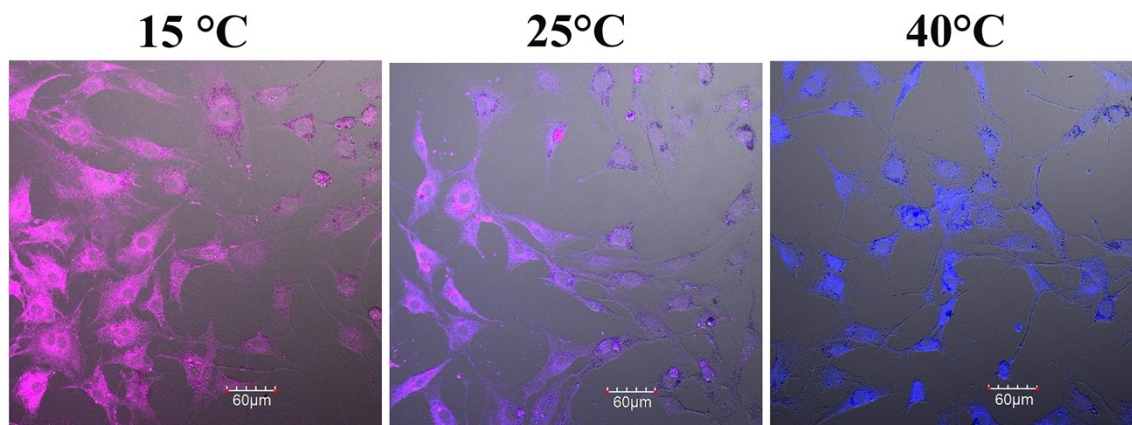

**Fig S14.** Confocal fluorescence images of MC3T3–E1 cells under different physiological temperature, incubated with 20  $\mu\text{g/mL}$  of C-dots/C-dots dual-emission nanospheres for 12 h. All images are obtained using an excitation of wavelength 405 nm. The emissions are recorded in the same range of 420–750nm.

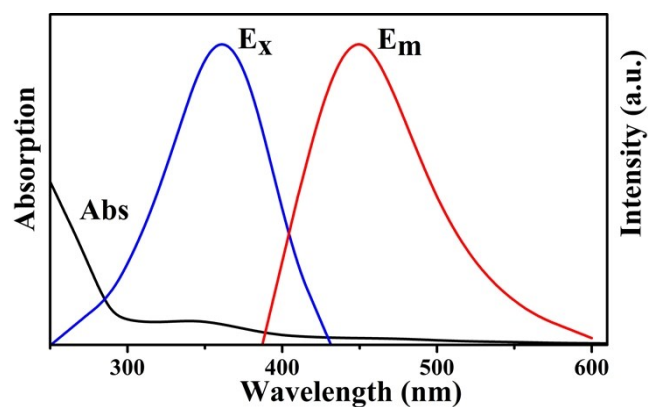

**Fig S15.** The absorption curves, excitation spectra and emission spectra of B-CDs.

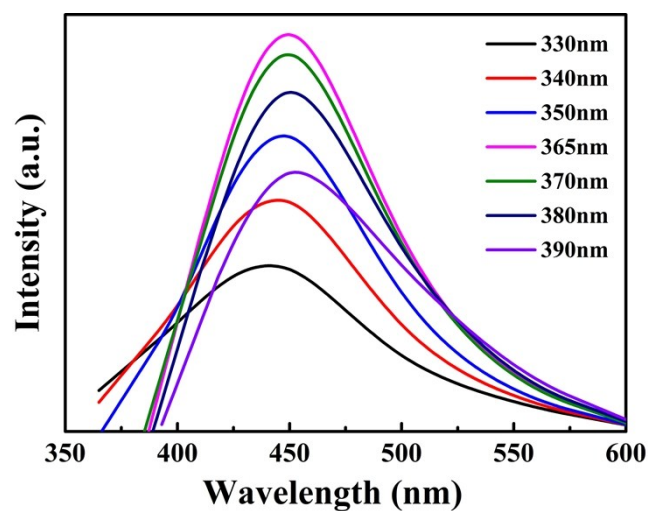

**Fig S16.** The PL emission spectra of B-CDs with different excitation wavelengths.

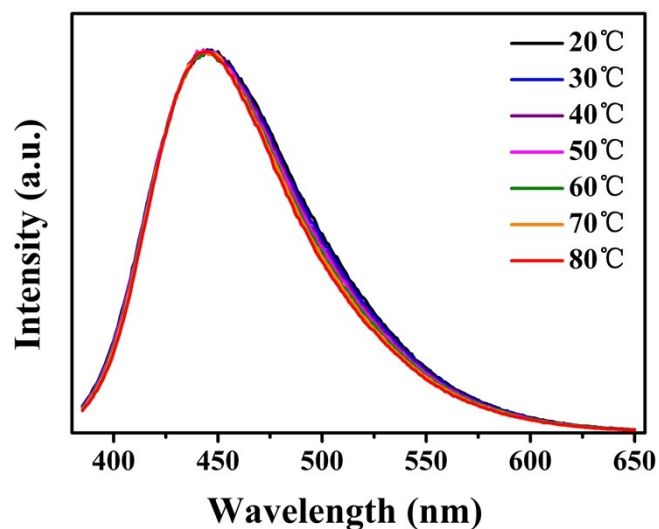

**Fig S17.** The PL emission spectra of B-CDs under different temperature, excited by the optimal excitation wavelength of 370nm.

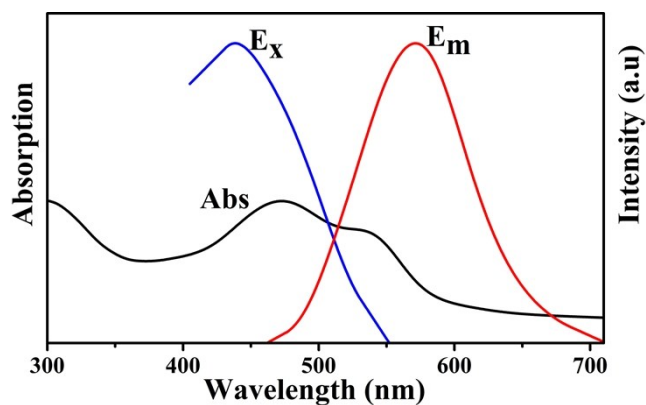

**Fig S18.** The absorption curves, excitation spectra and emission spectra of O-CDs.

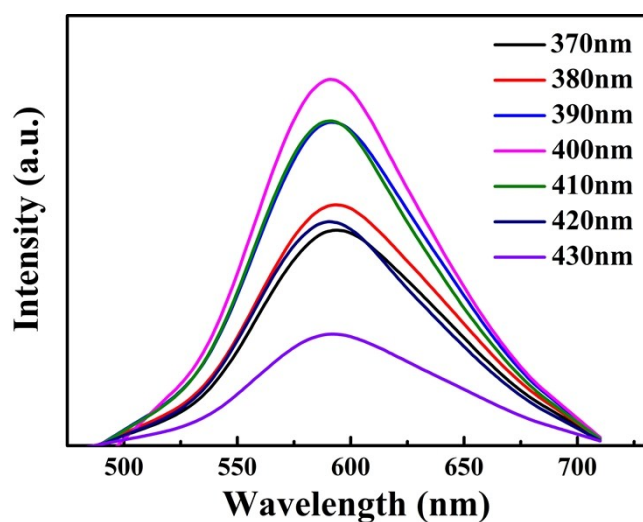

**Fig S19.** The PL emission spectra of O-CDs with different excitation wavelengths.

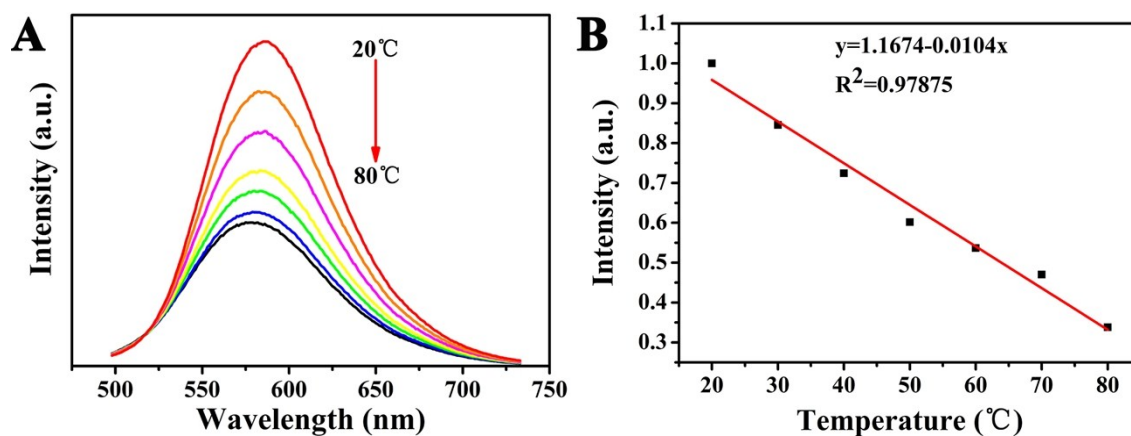

**Fig S20.** Temperature dependence of the fluorescence intensity from O-CDs in aqueous solution. A: Fluorescence emission spectra measured under excitation of 400 nm with the increasing temperature from 20 to 80 °C at a step of 10 °C; B: the fitted curve of intensity of 585 nm vs. temperature.

**Table S3.** Average fluorescence lifetime of B-CDs under different temperatures.

| T(°C) | $\tau_{ave}$ (ns) |
|-------|-------------------|
| 20    | 4.9               |
| 40    | 5.2               |
| 60    | 5.1               |
| 80    | 5.1               |

**Table S4.** Average fluorescence lifetime of O-CDs under different temperatures.

| T(°C) | $\tau_{ave}$ (ns) |
|-------|-------------------|
| 20    | 3.8               |
| 40    | 3.8               |
| 60    | 3.7               |
| 80    | 3.6               |

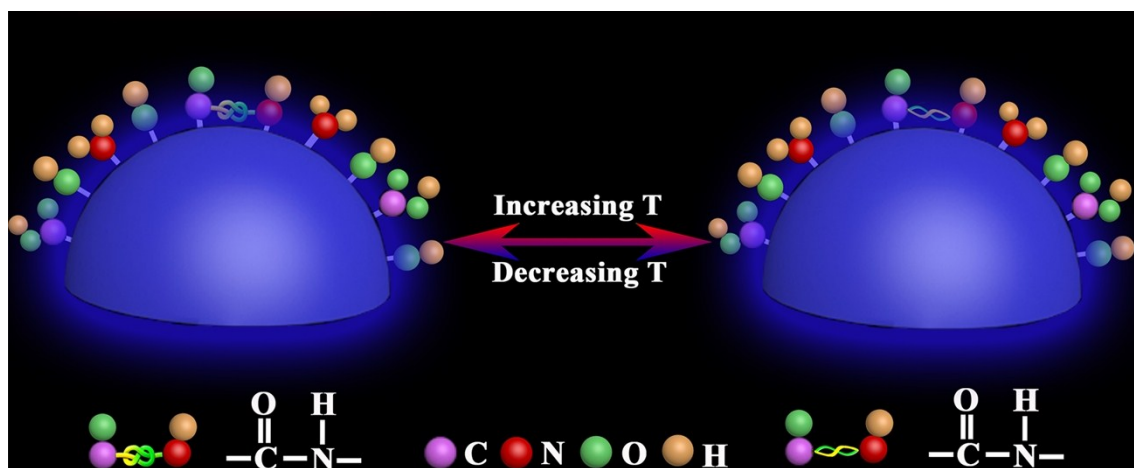

**Fig S21.** Scheme showing the surface state change of B-CDs.

## Reference

1. R. Miao, S. Zhang, J. Liu and Y. Fang, *Chem. Mater.* 2017, **29**, 5957-5964.
2. C. Wang, Z. Xu, H. Cheng, H. Lin, M. G. Humphrey and C. Zhang, *Carbon* 2015, **82**, 87-95.
3. C. Yao, Y. Xu and Z. Xia, *J. Mater. Chem. C* 2018, **6**, 4396-4399.
4. C. X. Wang, H. H. Lin, Z. Z. Xu, Y. Huang, M. G. Humphrey and C. Zhang, *ACS Appl. Mater. Interfaces* 2016, **8**, 6621-6628.
5. W. Liu, S. Xu, Z. Li, R. Liang, M. Wei, D. G. Evans and X. Duan, *Chem. Mater.* 2016, **28**, 5426-5431.
6. X. Liu, X. Tang, Y. Hou, Q. Wu and G. Zhang, *RSC Adv.* 2015, **5**, 81713–81722.
